# Supplementary material for: Snowmobile Impacts on the Physical and Mechanical Properties of Different Snowpacks in Colorado, U.S.A.
Source: Copernicus journal article supplement (doi:10.5194/tc-2017-26), 2017-04-18
Supplement: Supplementary file [file tc-2017-26-RC2-supplement.pdf]

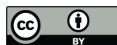

1 **Snowmobile Impacts on the Physical and Mechanical Properties of Different Snowpacks in**  
2 **Colorado, U.S.A.**

3 Jared T. Heath<sup>1,2</sup>, Steven R. Fassnacht<sup>1,3,4,5,6\*</sup>, Kevin J. Elder<sup>7</sup>

4 <sup>1</sup> Department of Ecosystem Science and Sustainability – Watershed Science, Colorado State  
5 University, Fort Collins, Colorado USA 80523-1476

6 <sup>2</sup> City of Fort Collins, Water Resources & Treatment, Fort Collins, Colorado USA 80521

7 <sup>3</sup> Cooperative Institute for Research in the Atmosphere, Fort Collins, Colorado USA 80523-1375

8 <sup>4</sup> Geospatial Centroid at CSU, Fort Collins, Colorado USA 80523-1019

9 <sup>5</sup> Natural Resources Ecology Laboratory, Fort Collins, Colorado USA 80523-1499

10 <sup>6</sup> Geographisches Institut, Georg-August-Universität Göttingen, 37077 Göttingen, Germany

11 <sup>7</sup> Rocky Mountain Research Station, US Forest Service, Fort Collins, Colorado USA 80526

12 \*Corresponding author: [steven.fassnacht@colostate.edu](mailto:steven.fassnacht@colostate.edu); phone: +1.970.491.5454

13

14 Short title: **Snowpack Changes due to Snowmobile Use**

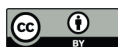

1 **Abstract**

2 Physical and material properties of the snowpack, including snow density, temperature,  
3 stratigraphy, hardness, and ram resistance were measured from snow pit profiles to examine the  
4 statistical difference between no use and varying degrees of snowmobile use (low, medium and  
5 high). The properties were examined across the entire snowpack, from the surface to its base, and  
6 for the basal layer of the snowpack. Experimental snow compaction study plots were located  
7 near Rabbit Ears Pass near Steamboat Springs, Colorado and at Fraser Experimental Forest near  
8 Fraser, Colorado. Significant changes in snowpack properties are associated with snowmobile  
9 use beginning early in the snow accumulation season when the snowpack is shallow, as well as  
10 earlier in the winter and at the base of the snowpack. These effects were amplified when  
11 snowmobile use occurred on a shallow snow covered environment and with increasing degrees  
12 of snowmobile use. On the contrary, snowmobile use that began on a deeper snowpack showed  
13 no significant changes in snowpack properties suggesting later initiation of use minimizes  
14 impacts to snowpack properties from snowmobile use.

15

16



## 17        **1. Introduction**

18            Winter recreation on snow is big business; in the United States, skiing accounted for over  
19        \$12 billion in 2010 (Burakowski and Magnusson, 2012) while snowmobiling accounted for  
20        between \$7 billion (American Council of Snowmobile Associations, 2014) to \$26 billion  
21        (International Snowmobile Manufacturers Association, 2016) annually. Across the United States,  
22        much of the snowmobile use is on public land, such as United States National Forest System  
23        with about 6 million snowmobile visits annually accessing about 327,000 km<sup>2</sup> of land (US Forest  
24        Service, 2010 and 2013a). Across the six Colorado and one southern Wyoming National Forests  
25        (NFs) there are 1.1 to 1.6 million annual snowmobile visits, with an increase from 580 thousand  
26        to 690 thousand between 2010 to 2013 in northern Colorado (Routt NF and Arapaho-Roosevelt  
27        NF) and southern Wyoming (Medicine Bow NF) (US Forest Service, 2010 and 2013a).  
28        Annually, snowmobiling added \$130 million to the Colorado economy (Colorado Off-Highway  
29        Vehicle Coalition, 2016) and \$125 millions to the Wyoming economy (Nagler et al., 2012). As  
30        the number of people participating in these activities increases annually (Cook and Borrie, 1995;  
31        Winter Wildlands Alliance, 2006), the presence of these human activities, especially snowmobile  
32        use, may be influencing snowpack properties in seasonally snow-covered environments. Further,  
33        as the climate changes, there will be reduced land available for snowmobiling (Tercek and  
34        Rodman, 2016), likely increasing the impact of snowmobile traffic.

35            There have been limited studies regarding the influence of snowmobile use on snowpack  
36        properties (Keddy et al., 1979; Thumlert et al., 2013). Snowmobile use on shallow snow (10 to  
37        20 cm deep) caused a doubling of fresh snow density, but much less impact on the underlying  
38        old snow, and had a highly significant effect upon natural vegetation below the snow (Keddy et  
39        al., 1979). For deeper snow, variation in stress on the snowpack was attributed to the type of



40 loading, depth and snowpack stratigraphy, stress decreased with increased depth and layer  
41 hardness, with more cohesive or supportive layers higher in the snowpack distributing the  
42 surface load (Thumlert et al., 2013). Most relevant studies relate to snow grooming at ski resorts  
43 (Fahay et al., 1999; Keller et al., 2004; Spandre et al., 2016a), or to traction and mobility of  
44 wheeled vehicles across a snowpack (Abele and Gow, 1990; Shoop et al., 2006; Pytka, 2010).  
45 We examined the effect of snowmobile use on the physical and material properties of the  
46 snowpack. The objectives of this research were: (1) quantify changes to physical snowpack  
47 properties due to compaction by snowmobiles; and (2) evaluate these changes based on the  
48 amount of use, depth of snow when snowmobile use begins,  the snowfall environment where  
49 snowmobiles operate. This work examines both the entire snowpack and the basal layer.

50

## 51 2. Study Sites

52 During the 2009-2010 snow season a set of snow compaction plots were located near  
53 Rabbit Ears Pass (REP) in the Rocky Mountains of northern Colorado to southeast of the town of  
54 Steamboat Springs. REP is within the Medicine Bow-Routt NF (Figure 1) along the Continental  
55 Divide encompassing over 9,400 km<sup>2</sup> (2 million acres) of land in Colorado and Wyoming.  
56 Rabbit Ears Pass is especially popular during the winter season and is heavily used by  
57 snowmobilers and other winter recreationalists due to the ease of access to backcountry terrain  
58 from Colorado Highway 40. Due to heavy use and conflict among users during the winter  
59 season, the Forest Service manages Rabbit Ears Pass for both non-motorized and motorized uses.  
60 The west side of pass is designated for non-motorized users and prohibits the use of motorized  
61 winter recreation and, the east side of the pass is a mixed use area and open to motorized users  
62 (Figure 1).



63 Two REP experimental snow compaction study plots were located adjacent to one  
64 another within an open meadow north of Colorado Highway 40 at an elevation of approximately  
65 3,059 m (Figure 1). The snow compaction sites were established within an area that prohibits  
66 motorized use to protect the study sites from unintended impacts of snowmobilers. The  
67 Columbine snow telemetry (SNOTEL) station, located at an elevation of 2,792 m, was used to  
68 characterize the 2009-2010 winter on REP.

69 Three operational sites were identified along Colorado Highway 40 on REP (Figure 1 left  
70 inset) where the specific amount of snowmobile use was unknown. The “natural” control site  
71 was Walton Creek, located west of Rabbit Ears Pass in an open meadow at an elevation of 2,895  
72 m within a managed area that prohibits motorized use. Snowshoers, skiers, and snowboarders  
73 primarily use this area in the winter to access backcountry terrain. Two treatment sites were  
74 located east of REP at an elevation of about 2,900 m within an area managed for motorized and  
75 mixed uses; the Dumont Lakes and Muddy Creek sites were located in open meadows near their  
76 trailheads (Figure 1). These trailheads provide backcountry access to snowmobilers and  
77 snowmobile use in the meadows near the trailheads is medium to high, especially on weekends  
78 and over holidays. The meadow near the Muddy Creek trailhead is more heavily used by  
79 snowmobiles than the meadow near the Dumont Lakes trailhead.

80 Another experimental snow compaction plot was established at the Fraser Experimental  
81 Forest (FEF) near the town of Fraser, Colorado in the Rocky Mountains of Central Colorado  
82 (Figure 1). The 93 km<sup>2</sup> experimental forest is a research unit of the United States Forest Service  
83 (USFS) Rocky Mountain Research Station (RMRS) located within the Arapaho NF. The FEF  
84 snow compaction site was located in a small meadow at an elevation of 2,851 m among  
85 lodgepole pine (*Pinus contorta*) forest. The Fraser Experimental Forest is closed to snowmobile



86 use, but is used in the winter to access backcountry terrain by snowshoers, skiers, and  
87 snowboarders. The Berthoud Summit SNOTEL station, located at an elevation of 3,444 m, was  
88 used to characterize the 2009-2010 winter at FEF.

89

### 90 **3. Methods**

#### 91 **3.1 *Experimental snow compaction plots***

92 Snow compaction study plots were established in undisturbed areas at the REP and FEF  
93 experimental snow compaction study areas. Each plot was 22 m wide and 15 m long. Plots were  
94 divided into equal width transects (2 m) and treated with low, medium (FEF only), or high  
95 snowmobile use, including a no treatment control transect representing an undisturbed  
96 snowpack. Two control transects were used at FEF to represent the undisturbed snowpack.  
97 Integrating two controls in the study plot allowed for replication and determination of variability.  
98 The location of control and treatment plots across each study site was randomly selected. Each  
99 transect was separated by a three meter buffer to eliminate the influence of compaction  
100 treatments on adjacent transects.

101 Transects were treated by driving  over the length of each transect five, 25  
102 (FEF only) or 50 times, representing low, medium (FEF only), and high snowmobile use,  
103 respectively. Treatments began when non-compacted snow depths were approximately 30 cm  
104 (12 inches) for both locations, and when unpacked snow depths equaled approximately 120 cm  
105 (48 inches) for REP only. Treatments were implemented monthly thereafter, until peak  
106 accumulation (Figure 2). Snowpack sampling was performed within a week after each treatment,  
107 and continued through the duration of the winter season (Figure 2).

108



109 **3.2 Snow pit analyses and data collection**

110 Snow pit profiles were used to examine the physical properties of the snowpack in all study sites.  
111 A vertical snow face was excavated by digging a pit from the snow surface to the ground with  
112 measurements of snow density, temperature, stratigraphy, hardness and ram resistance taken  
113 vertically throughout the snowpack. Total snow depth was measured and combined with density  
114 to yield snow water equivalent (SWE). Physical snowpack properties were compared between  
115 non-snowmobile (control) and varying degrees (low, medium (FEF), and high) of snowmobile  
116 use (treatment).

117 Density was measured at 10 cm intervals, from the surface of the snowpack to the  
118 ground, by extracting a 250 mL or 1000 mL snow sample using a stainless steel wedge cutter  
119 [snowmeters.com](http://snowmeters.com) and measuring the mass on an electronic scale with a resolution of 1g. The  
120 density of the snow ( $\rho_s$  in  $\text{kg/m}^3$ ) was determined by dividing the mass of the snow sample by the  
121 volume of the wedge cutter. Snowpack density profiles and bulk snowpack density were  
122 compared. The bulk snowpack density was determined by averaging the depth integrated density  
123 measurements through the entire depth of the snowpack. A mean of the density measurements  
124 for the bottom 10 cm of the snowpack were used to evaluate changes near the snow and ground  
125 interface (basal layer).

126 Temperature measurements were obtained at 5 cm intervals from the top to the bottom of  
127 the snowpack using a dial stem thermometer with  $\pm 1^\circ\text{C}$  accuracy. However, repeatability for any  
128 given temperature is better than  $\pm 1^\circ\text{C}$  and temperature gradients are well represented by this  
129 instrument (Elder et al., 2009; Greene et al., 2009). Snowpack temperature profiles and the  
130 corresponding bulk temperature gradient were compared. The temperature gradient ( $T_G$  in  $^\circ\text{C/m}$ )  
131 was calculated as the ratio of the change in temperature ( $\Delta T$  in  $^\circ\text{C}$ ) from the point of zero



132 amplitude (upper boundary, 25-30 cm below the surface) and the temperature at 0 cm (lower  
133 boundary) with the distance ( $d$  in m) over which the change in temperature occurred. For this  
134 study, the point of zero amplitude was used as the upper boundary to remove bias from diurnal  
135 fluctuations (Pomeroy and Brun, 2001). Basal layer temperatures (0 cm) were used to compare  
136 temperature changes near the snow and ground interface.

137 Stratigraphic measurements illustrate the evolution of the snowpack over time by  
138 characterizing the shape and size of snow crystals within each stratified layer of the snowpack.  
139 Classification of grain morphology was based on *The International Classification for Seasonal*  
140 *Snow on the Ground* (Fierz et al., 2009) and grain shape was measured and recorded to the nearest  
141 0.5 mm using a hand lens and a crystal card. The main crystal forms / layer types were fresh,  
142 rounded, faceted, and ice layers.

143 Hardness is the snowpack's compressive strength and is measured as the force per unit  
144 area required to penetrate the structure of the snowpack (McClung and Schaerer, 2006) due to  
145 microstructure and bonding characteristics of the snow grains (Shapiro et al., 1997). Hardness  
146 measurements were taken horizontally with a force gauge in each stratigraphic layer using a  
147 Wagner Instruments Force Dial gauge (<http://wagnerinstruments.com>) with maximum force  
148 measurements of 25 N and 100 N, and fabricated circular metal plate attachments of known area.  
149 The circular metal plate was pushed into the snow and the force required to penetrate the snow  
150 was recorded. The snow hardness ( $h_i$  in  $\text{N/m}^2$ ) for each stratigraphic layer was calculated as the  
151 force required to penetrate the snow ( $F$  in N) per unit area of the circular metal plate ( $A$  in  $\text{m}^2$ ).  
152 The bulk snowpack hardness ( $H_B$  in  $\text{N/m}^2$ ) was determined by weighing each stratigraphic layer  
153 hardness measurement by the stratigraphic layer thickness. The hardness associated with the





154 bottom stratigraphic layer for each transect was used to describe hardness changes in the basal  
155 layer of the snowpack.

156 The standard ram penetrometer is an instrument used to vertically measure the relative  
157 hardness or resistance of a snow layers (Greene et al., 2009) and was used to assess the change in  
158 ram resistance due to compaction through the duration of the winter season. A ram profile  
159 measurement was taken 0.5 meters from the edge of the snow pit wall subsequent to snow pit  
160 profile measurements. The mean ram resistance ( $S_B$  in N) was determined by weighting each  
161 stratigraphic layer's ram resistance value obtained from the standard ram penetrometer  
162 measurement with the layer thickness. The ram resistance value associated with the bottom  
163 stratigraphic layer was measured to describe changes in ram resistance in the basal layer of the  
164 snowpack .

165

### 166 3.3 *Statistical analyses*

167 Data were analyzed using the Mann-Whitney-Wilcoxon rank sum test (Wilcoxon, 1945;  
168 Mann and Whitney, 1947). This determines the statistical significance between two datasets,  
169 herein different treatments compared to the control of no snowmobile use (Table 1). This  
170 statistical test is non-parametric and determines whether two samples were selected from  
171 populations having the same distribution. The sets samples of samples are comparable density,  
172 temperature, hardness, and ram resistance profiles for the five different monthly measurements.  
173 A statistical significance was determined to the 95% and 99% confidence interval ( $p < 0.05$ , and  
174  $p < 0.01$ ) and noted with an asterisk in Table 1.

175

## 176 4. Results



177 The 2009-2010 winter at REP had a below average SWE based on the Columbine SNOTEL data  
178 (Figure 2). A peak SWE of 556 mm was observed on 9 April, which was 93 percent of the  
179 historical average peak SWE. Maximum snow depth measured at the REP snow compaction  
180 study plot was approximately 1.5 m and therefore represented a deep snow cover environment.  
181 From the Berthoud Summit SNOTEL data, the 2009-2010 winter at FEF had an above average  
182 SWE compared to the 29-year historical average (Figure 2). A peak SWE of 622 mm was  
183 observed on 16 May, which was 115 percent of the historical mean peak SWE. Measured snow  
184 depth at the FEF snow compaction study plot never exceeded 1 m and therefore represented a  
185 shallow snow cover environment.

186

#### 187 **4.1 Density**

188  snowpack density increased at the REP snow compaction study site when low and high use  
189 compaction treatments began on 30 cm of snow (Figure 3a). As a result, low and high use  
190 compaction treatments were significantly different between these treatments (low and high) and  
191 the control, and compared to both low and high use compaction treatments beginning on 120 cm  
192 of snow (Table 1). The largest bulk snowpack density difference was observed on 6 February  
193 when the control bulk density was 246 kg/m<sup>3</sup>, while the low and high use compaction treatments  
194 yielded an increase to 285 kg/m<sup>3</sup> and 328 kg/m<sup>3</sup>, respectively (Figure 3a). In contrast,  
195 compaction treatments (low and high) beginning on 120 cm of snow (Figure 3b) did not  
196 significantly alter the bulk snowpack density compared to the control (Table 1). While the bulk  
197 snowpack density increased through the duration of the study period, by the last sampling date  
198 bulk snowpack density was similar between the control and treated transects (Figure 3av and  
199 3bv). Treatment increased the density in the basal layer of the snowpack, with the largest



200 difference of 75% (density of  $351 \text{ kg/m}^3$ ) and 88% ( $377 \text{ kg/m}^3$ ) for low and high use compaction  
201 treatments observed on 12 December, respectively, compared to just over  $200 \text{ kg/m}^3$  for the  
202 control (Figure 3ai). Snow compaction treatments had little impact on basal layer densities when  
203 treatments began on 120 cm of snow with the largest difference being observed on 6 February as  
204  $229$ ,  $234$ , and  $268 \text{ kg/m}^3$  for the control, low and high treatments, respectively (Figure 3biii).

205 Bulk snowpack density also increased at the FEF snow compaction study site for all  
206 compaction treatments (low, medium, and high use) that began on 30 cm of snow (Figure 3c).  
207 Significant differences were observed between all treatments and the control. However, there  
208 were no significant differences between the varying treatments (Table 1). For low and medium  
209 use compaction treatments the largest difference in bulk snowpack density compared to the  
210 control was on 12 February when density was measured at  $177$ ,  $296$ , and  $311 \text{ kg/m}^3$ , for the  
211 control, low and medium treatment, respectively (Figure 3ciii). Snowpack density measured for  
212 high use had the largest difference from the control on 22 January when bulk snowpack density  
213 was  $341 \text{ kg/m}^3$  compared to a bulk density of  $192 \text{ kg/m}^3$  for the control (Figure 3cii). Bulk  
214 snowpack density generally increased during the study period, but by the end of the study period  
215 there were minimal differences between the control and varying degrees of compaction (Figure  
216 3cv). Basal layer density increased from all compaction treatments. After the first treatment on  
217 27 December, the basal layer density increased by 148% ( $288 \text{ kg/m}^3$ ) for low use to about 190%  
218 of medium and high use, compared to  $116 \text{ kg/m}^3$  for the control (Figure 3ci).

219

## 220 4.2 Temperature

221 Low and high use compaction treatments at the REP snow compaction study site that began on  
222 both a shallow snowpack of 30 cm and on a deep snowpack of 120 cm did not result in



223 significant changes to the temperature gradient. The maximum temperature gradients were  
224 observed on 12 December as 18, 28, and  $25^{\circ}\text{C m}^{-1}$  for the control, low use, and high use  
225 compaction treatments that began on a shallow snowpack, while they were almost the same (23,  
226 23, and  $25^{\circ}\text{C m}^{-1}$ ) for the control, low use, and high use compaction treatments that began on a  
227 deep snowpack. Temperature gradients for all treatments decreased throughout the winter season  
228 until all uses exhibited a temperature gradient approaching  $0^{\circ}\text{C m}^{-1}$  by 17 April, favoring  
229 sintering and bonding of snow crystals. The coldest basal layer temperatures were about -2 and -  
230  $3^{\circ}\text{C}$  on 12 December for all treatments compaction treatments began on deep and shallow  
231 snowpack, respectively. Basal layer temperatures increased throughout the winter season until all  
232 uses exhibited a basal layer temperature of  $-1^{\circ}\text{C}$  by 17 April.

233 Low, medium and high use compaction treatments at the FEF snow compaction study site  
234 did not significantly impact the temperature gradient. Maximum temperature gradients for low,  
235 medium, and high use were  $30^{\circ}\text{C m}^{-1}$ ,  $13^{\circ}\text{C m}^{-1}$ , and  $20^{\circ}\text{C m}^{-1}$  on 27 December compared to  $20^{\circ}\text{C}$   
236  $\text{m}^{-1}$  measured at the control. Temperature gradients decreased throughout the winter season until  
237 all uses exhibited a temperature gradient near  $0^{\circ}\text{C m}^{-1}$  by 26 April (Figure 4b). The coldest basal  
238 layer temperature was for medium use on 22 January ( $-6^{\circ}\text{C}$ ), with a basal layer temperature of -  
239  $5^{\circ}\text{C}$  on 27 December for all other treatments. Basal layer temperatures increased for all uses  
240 throughout the winter season until basal layer temperatures reached  $-1^{\circ}\text{C}$  by 26 April (Figure 4b).  
241

#### 242 4.3 Hardness

243 Measured snowpack hardness increased at the REP snow compaction study site following low and  
244 high use compaction treatments that began on 30 cm of snow (Figure 5a), but only for high use  
245 at the deeper snowpack (Figure 5b). Significant increases in hardness were observed between



246 treatments that began on 30 cm of snow and the control, and between compaction treatments  
247 (low and high) that began on 120 cm of snow (Table 1). For the treatment  that began on the  
248 shallow snowpack, the maximum mean hardness for the control was 82 kPa for the control on 17  
249 April (Figure 5av) while for the low use treatment a maximum of 174 kPa was measured on 12  
250 December and for the high use treatment, a maximum of 487 kPa was measured on 6 February.  
251 In contrast, mean snowpack hardness was not significantly impacted by snow compaction  
252 treatments that began on 120 cm of snow (Table 1). Mean snowpack hardness increased  
253 following the initial snow compaction treatments for low and high use, but subsequent  
254 compaction treatments did not appear to have a large effect (Figure 5b and Table 1). Mean  
255 snowpack hardness for low and high use was greater than the control following the initial snow  
256 compaction treatment for both initiation depths (30 cm and 120 cm), but there were minimal  
257 differences by the last sampling date (Figure 5av and 5bv).

258 Snow compaction treatments that began on 30 cm of snow increased basal layer hardness  
259 (Figure 5a), but treatments that began on 120 cm of snow did not impact basal layer hardness  
260 (Figure 5b). For the former, the maximum basal layer hardness was measured at 188 kPa (Figure  
261 5ai) and 158 kPa (Figure 5aiii) for the low and high treatments, respectively. For both controls  
262 and all treatments that began on 120 cm of snow (Figure 5b), the maximum basal layer hardness  
263 was about 6 kPa.

264 Low, medium, and high use compaction treatments resulted in a significant increase in  
265 mean snowpack hardness following snow compaction treatments beginning on 30 cm of snow at  
266 the FEF snow compaction study site (Table 1). These generally increased during the study  
267 period; however, treated transects were approaching control values by the last sampling date  
268 (Figure 5c). For the control, the maximum mean snowpack hardness was about 25 kPa (on 26



269 March in Figure 5civ) while the maximum treatment hardness was orders of magnitude higher at  
270 395 kPa (low treatment on 22 January, Figure 5cii), 780 kPa (medium treatment on 26 March,  
271 Figure 5civ) and 4,627 kPa (high treatment on 26 March, Figure 5civ). Similarly, the maximum  
272 basal layer hardness for the control was only 4 kPa (on 26 March, Figure 5civ) and 138, 352 and  
273 728 kPa for low, medium and high use, respectively (Figure 5cii, 5civ, and 5civ).

274

#### 275 **4.4 Ram resistance**

276 Low and high use compaction treatments at REP caused an increase in mean snowpack ram  
277 resistance (Figure 6a and 6b), but the difference was only significant for treatments that began on  
278 30 cm of snow (Table 1). The maximum mean snowpack ram resistance was measured as 128,  
279 203, and 496 N for the control, low and high use, respectively (Figure 6av, 6av, and 6aiii). After  
280 the initial snow compaction treatments mean snowpack ram resistance for low and high use was  
281 greater than the control for the entire study period, but by the end of the study period minimal  
282 differences were observed between treatments. Basal layer ram resistance increased as a result of  
283 low and high use compaction treatments that began on both 30 cm (44, 614, and 1,297 N for  
284 control, low and high use) and 120 cm of snow (44, 270 and 90 N for control, low and high use).

285 Snow compaction treatments at the FEF snow compaction study site caused a significant  
286 increase in mean snowpack ram resistance (Figure 6c; Table 1). Maximum mean snowpack ram  
287 resistance for the control was 18 N (26 March, Figure 6civ), for low and medium use it was  
288 544N and 591N (26 March, Figure 6civ) respectively, while for high use it was measured at  
289 866N (on 12 February, Figure 6c). Basal layer ram resistance increased following the initial  
290 snow compaction treatments and continued to increase throughout the duration of the winter



291 season, with maximums of 28 (26 March), 1,220, 1,220, and 3,220 N for the control, low,  
292 medium, and high treatments (on 12 February for all the use treatments).

293

#### 294 **4.5 Operational Sites**

295 As illustrated by SWE (Figure 7d) and depth (Figure 7a), the amount of snow was similar for the  
296 snowpits dug at the three operational sites, but not the same since they were up to 6km apart  
297 (Figure 1). Also these were operational sites, i.e., the amount of treatment was not controlled and  
298 was based solely on permitted use. Patterns of increased density (Figure 7a), hardness (Figure  
299 7b) and ram resistance (Figure 7c) were similar to the previous presented experiments (Figures 3,  
300 5, and 6) with the non-snowmobile snowpits being less dense (Figure 7a) and having layers that  
301 were less hard (Figure 7b). For visual inspection, Muddy Creek had the most snowmobile use  
302 and thus had the highest density throughout the winter, and the hardest snowpack for mid-winter  
303 (Figure 7bii to 7biv) but at times was similar to Dumont Lakes.

304

### 305 **5. Discussion**

306 At rest, a snowmobile and its rider exert 4 to 10 kPa of pressure to the underlying  
307 snowpack (assuming a track length from 0.9 to 1.4 m, width of 0.50 m, a snowmobile weight of  
308 200 to 350 kg, and a rider weight of about 100 kg, data from  
309 <http://www.polarisindustries.com>). This increase by less than an order of magnitude due to  
310 snowmobile movement (Thumlert et al., 2013 measured stresses of about 10 to 20 kPa at a depth  
311 of 30 cm below the surface of a deep snowpack). In comparison, fresh snow with a density of  
312 100 kg/m<sup>3</sup> exerts a pressure of 0.003 kPa to the underlying snowpack (Moynier, 2006).  
313 Snowpack loading by wheeled vehicles on a shallow snowpack was much greater, peaking at



314 about 350 kPa (Pytka, 2010). Grooming vehicles added a load similar to snowmobiles (Pytka,  
315 2010), due to the larger track size. Thus, the snowpack results shown herein are transferrable to  
316 grooming machinery.

317 The snowpack is persistently changing, once snow starts to accumulate on the ground.  
318 The density of snow varies over space, time and with depth. For fresh snow, density ranges from  
319 40 to 200 kg/m<sup>3</sup> (Diamond and Lowry, 1953; Schmidt and Gluns, 1991; Fassnacht and Soulis,  
320 2002). The density of fresh snow can double with just one pass of a snowmobile on a very  
321 shallow snowpack (Keddy et al., 1979), and even with more accumulation, density will increase,  
322 but the underlying snow also gets more dense (Figures 3 and 7a).

323 Once snow accumulates on the ground, the morphology alters the physical and material  
324 properties of the snowpack from the surface down, such as changing its density and hardness.  
325 Since the base of the snowpack remains at approximately 0°C due to warm summer temperatures  
326 and geothermal heating (Auerbach and Halfpenny, 1991; Pomeroy and Brun, 2001), variable  
327 atmospheric air temperatures fluctuate between the relatively warm days and relatively cold  
328 nights (McClung and Schaerer, 2006) and generate strong temperature and vapour pressure  
329 gradients causing kinetic growth metamorphism that creates cohesionless faceted snow grains.  
330 Conversely equilibrium metamorphism creates rounded grains that can easily sinter  
331 (Sommerfeld, 1970; Colbeck, 1982; Colbeck, 1983; Colbeck, 1987). Rounding increases density  
332 and snowpack strength. This increase in density and hardness is greatest compared to an  
333 untreated snowpack in early to mid-season (January) for a deeper snowpack (REP in Figures 3a,  
334 and 5a), and later into the snow season for the shallower snowpack (FEF in Figures 3c, and 5c).  
335 Similar differences were found due to ski run grooming in an Australia snowpack with a 400%  
336 increase in hardness early in the snow season but only about a 40% increase later in the winter



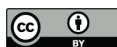

337 (Fahey et al., 1999). Snow grooming increased the average density by up to 36% compared to  
338 non-groomed ski slopes (Fahey et al., 1999, Rixen et al., 2001).

339           Compaction of the snowpack changes in density, hardness and ram resistance (Figures 3,  
340 5, 6, and 7), and results in deformation of snowthrough alterations in the ice matrix  
341 (bonding/grain contacts) (Shapiro et al., 1997). Since hardness depends predominantly on grain  
342 characteristics, such as bonding and grain contacts (Shapiro et al., 1997) and decreasing grain  
343 size results in increased density, then compaction due to snowmobile use may alter the  
344 microstructure of the snowpack (Table 2), directly influencing these physical and mechanical  
345 properties (Table 1). Such changes were observed for varying snowmobile use beginning on two  
346 different snow depths (REP only in Figures 3a, 5a, 6a versus Figures 3b, 5b, 6b) and for two  
347 different snow covered environments (Figures 3c, 5c, 6c).

348           Field observations prior to snowmelt have revealed maximum late season snowpack  
349 densities ranging from 290 kg/m<sup>3</sup> to 400 kg/m<sup>3</sup> with snow densities as high as 500 kg/m<sup>3</sup> during  
350 snowmelt (Gold, 1958; Longley, 1960), while densities of depth hoar layers prior to melt were  
351 about 300 kg/m<sup>3</sup> (Greene et al., 2009; Sturm et al., 2010). For a deep snow cover environment  
352 (REP), compaction treatments beginning on a shallow snowpack (30 cm) resulted in a 15% and  
353 33% increase in density for low and high use treatments, respectively (Figure 3a), observed mid-  
354 winter (early February), similar to maximum late season natural snowpack densities (Gold, 1958;  
355 Longley, 1960; Giddings and LaChapelle, 1962). Density differences were greatest for a shallow  
356 snow cover environment (FEF), with high use resulting in 78% greater density (Figure 3c).  
357 Conversely, no significant differences in density were observed when snowmobile use began on  
358 a deep snowpack (120 cm) (Figures 3b, Table 1).



359 Increased densification of the snowpack due to snowmobile use influences snow hardness  
360 (Figure 5) and ram resistance (Figure 6) due to changes in the arrangement of ice grains. In this  
361 study, snow-hardness gauges and circular metal plates of known area were used (McClung and  
362 Shaerer, 2006), rather than the in situ (avalanche evaluation) hand hardness test (Greene et al.,  
363 2009). Snowmobile use beginning on a shallow snowpack (30 cm) for a deep snowpack (REP)  
364 resulted in a 2- and 6-fold increase in maximum snow hardness for low and high use compared  
365 to no use, whereas at a shallow snow study site (FEF), a 15-, 30- and nearly 200-fold increase in  
366 maximum snow hardness for low, medium, and high use was observed. A shallow snow  
367 environment is more susceptible to large changes in snow hardness due to varying snowmobile  
368 use.

369 Ram resistance values ranged from 0 N to just below 1000 N, which is a normal range for  
370 snowpack strength measurements (Colbeck et al., 1990). The precision of the ram penetrometer  
371 used in this study was 10N so the ram resistance of an undisturbed snowpack, typically in the  
372 range of 0.5N (Pruitt, 2005), could not be measured. These values can increase to as much as  
373 70N as a result of two passes with one person on a snowmobile (Pruitt, 2005). Similar to  
374 hardness observations, snowmobile use beginning on a shallow snowpack yielded ram resistance  
375 1.5- and 4-fold greater than the natural snowpack (Figure 6). The impact of snowmobile use on a  
376 snowpack ram resistance (Figures 6 and 7c) has only been observed by Pruitt (2005). More  
377 frequent fresh snowfall events (REP, Figure 6a) with compaction treatments can produce a  
378 snowpack of stratified strong and weak layers, and a deeper snowpack is capable of lessening the  
379 effect of compaction from snowmobile use (Figure 6b).

380 As crystals become compacted due to snowmobile use, there is an increase in bonding  
381 between crystals and early compaction impedes further kinetic growth. Temperature gradients



382 were as high as  $33^{\circ}\text{C m}^{-1}$  at the beginning of the season, about twice what was observed by de  
383 Quervain (1958) in alpine snowpacks, and approached  $0^{\circ}\text{C m}^{-1}$  as the snowpack became isothermal  
384 at the end of the winter season. However, temperature gradients in this study were unaffected by  
385 compaction from snowmobile use (Figure 4, Table 1) potentially due to the edge effect of heat  
386 transfer from the warmer ground adjacent to the plots, heat transfer from the buffer areas located  
387 parallel to compaction transects, and diurnal changes in ambient air temperatures. The  
388 temperature gradient was sufficient for kinetic growth metamorphism for most of the winter  
389 season ( $T_G > 10^{\circ}\text{C m}^{-1}$ ), as seen by less dense lower snowpack layers for the controls (Figures 3a,  
390 3c, 7a) and the deep snowpack where snowmobile use started at 120 cm (Figure 3b).

391 A decrease in crystal size was observed for both the deep and shallow snowpacks  
392 subjected to snowmobile use (Table 2). Specifically, depth hoar crystals for the controls at FEF  
393 reached a maximum average size of 9.0 mm, while low, medium, and high use resulted in  
394 average crystal sizes of 1.3 mm, 2.5 mm and 1.5 mm, respectively (Table 2). While the  
395 temperature profile differences between control and snowmobile use were not significant,  
396 temperature gradients and thus vapour pressure gradients were less, decreasing depth hoar  
397 growth (Table 2). Similarly, this trend was observed on REP, although the deeper snow  
398 environment allowed growth of depth hoar but the difference in depth hoar crystal sizes between  
399 control and treatments was less (Table 2).

400 The overall increase in density, hardness and ram resistance (Figure 6) was statistically  
401 significant between the control (no snowmobile use) and all treatments, except when treatments  
402 were initiated on a deep snowpack (Figures 3b, 5b, and 6b, Table 1). The measured depth of  
403 influence for a snowmobile is about 90 cm (Thumlert et al., 2013). At 20 cm below the snow  
404 surface, the induced stress is already much less than 10 cm below the surface from a snowmobile



405 (Thumlert et al., 2013) or a grooming machine (Pytka, 2010). Most ski resorts in the French Alps  
406 required a minimum snow depth of 40 cm to offer skiing, with a range from 60 cm in February to  
407 40 cm in April (Spandre et al., 2016b). The US Forest Service (2013b) recommends a minimum  
408 of 30 cm before the use of snowmobiles. Increasing the minimum snow depth before allowing  
409 snowmobile traffic will reduce changes to the snowpack due to snowmobiles (Table 1).

410 Snowmobile use was found to have a highly significant effect upon natural vegetation  
411 below the snow (Keddy et al., 1979), with grooming shown to delay the blooming of alpine  
412 plants (Rixen et al., 2001) due to a later snowmelt and a significantly cooler soil (Fassnacht and  
413 Soulis, 2002). Deeper snowpack were found to not have a cooler soil temperature under the  
414 snowpack (Keller et al., 2004), but did melt out four weeks later, and this resulted in a cooler  
415 snowpack at the end of the summer (Keller et al., 2004). Since the snowpack changes due to  
416 snowmobile traffic on a shallow snowpack were significant (Table 1), the effects of snowmobile  
417 use on the soil and vegetation underlying a shallow snowpack should be further investigated.

418 Snow depth will likely be less for areas with snowmobile traffic (Figure 3; Rixen et al.,  
419 2001; Spandre et al., 2016a). However, this depends upon the meteorological conditions,  
420 specifically the frequency and magnitude of wind. The local terrain features and position and  
421 extent of canopy influence how the wind interacts with the snowpack (Pomeroy and Brun, 2001).  
422 In an Australia case study, SWE increased by 45% in groomed areas (Fahey et al., 1999); at the  
423 Rabbit Ears Pass recreational use areas, SWE also increased (Figure 7d) due to snow blowing  
424 into the depressions created by snowmobile tracks. The increased load could further impact the  
425 underlying snowpack properties.

426 Snowmaking is performed to supplement natural snow conditions. In the French Alps,  
427 about of third of the ski slopes equipped are equipped with snowmaking facilities and this is



428 expected to increase, due in part to a changing climate (Spandre et al., 2016b). Artificial snow  
429 has substantially different properties than natural snow, and adds an additional load to the  
430 underlying snowpack (Spandre et al., 2016a). This additional snow compacts the snowpack  
431 below it, and may create surface different conditions (Howard and Stull, 2014). Grooming of  
432 artificial snow further compressed the snowpack (Spandre et al., 2016a). If the results presented  
433 in this paper are extended to ski areas, the addition of artificial snow must be considered.

434 In Colorado alone, the economic impact of the ski industry was \$4.8 billion during the  
435 2013-14 ski season (Colorado Ski Country USA, 2015). Regardless of the use, adding mass to  
436 the snowpack, through snowmaking (Spandre et al., 2016a), grooming (Fahey et al., 1999; Rixen  
437 et al., 2001; Spandre et al., 2016a), or snowmobile use (figure 7), will alter the snowpack  
438 (Figure 3-6). A changing climate will likely reduce the extent of terrain and decrease the length  
439 of the winter recreation season (Laxar and Williams, 2008; Steiger, 2010; Dawson and Scott,  
440 2013; Marke et al., 2015; Tercek and Rodman, 2016). In all cases, due to climate change, more  
441 snowmaking will be required (Steiger, 2010; Spandre et al., 2015) and this artificial snow will  
442 impact the snowpack properties (Spandre et al., 2016a). The results presented herein are useful  
443 when modeling the impact of grooming or snowmaking on the snowpack of ski runs (e.g.,  
444 Howard and Stull, 2014; Marke et al., 2015; Spandre et al., 2016a).

445

## 446 6. Conclusion

447 This study examined the effect of compaction from snowmobile use on snowpack properties. It  
448 showed that snowpack properties change with varying use of snowmobile use, with the amount  
449 of snowfall, and at the initiation of use. Snowmobile use creates compaction that influences the  
450 physical and mechanical properties of the snowpack. In particular, this increases snowpack



451 density, hardness, and ram resistance when winter recreational use occurs. The largest  
452 differences in snowpack properties are associated with snowmobile use beginning on a shallow  
453 snowpack (30 cm), which increases snowpack density, hardness, and ram resistance. These  
454 increases are directly related to increasing snowmobile use (from low to medium to high).  
455 Conversely, snowmobile use that begins on a deep snowpack (120 cm) has a limited effect on  
456 snowpack properties as seen by density, temperature, hardness, and ram resistance measurements  
457 comparable to an undisturbed snowpack.

458 Snowpack properties of varying snowpack environments (shallow vs. deep) respond  
459 differently to snowmobile use. Shallow snow covers experience an increase in snowpack density,  
460 ram resistance, and hardness that are more pronounced than changes to these properties when  
461 snowmobile use operates on a deep snowpack. These changes in the physical properties of the  
462 snowpack are due to snowmobile use operating on an already compacted snowpack yielding  
463 thick layers of dense, strong, hard snow. Deep snow covers experience more snowfall events that  
464 create “cushions” of relatively undisturbed snow between compaction events lessening the effect  
465 of snowmobile use on snowpack properties. These differences between snow environments  
466 suggest that shallow snowpacks are more susceptible to larger changes in snowpack properties.

467

#### 468 **Author contribution**

469 The exper<sup>iment</sup>it were designed by J.T. Heath and S.R. Fassnacht with input from K.J. Elder. J.T.  
470 Heath performed the experiments with assistance from K.J. Elder at the Fraser site. All authors  
471 contributed to the writing of the manuscript.

472



473 **Acknowledgments**

474 Appreciation goes to Robert Skorkowsky, Kent Foster and Becky Jones of the Hahns  
475 Peak/Bears Ears Ranger District of the US Forest Service for their help and support with  
476 compaction treatments at the Rabbit Ears Pass study site. Additional thanks goes to James  
477 zumBrunnen of the Colorado State University Statistics Department for his assistance with  
478 statistical interpretation. Jared Heath would also like to recognize the Colorado Mountain Club  
479 for their help supporting this project with a generous grant. Dr. Jim Halfpenny and two  
480 anonymous reviewers provided insight into clarifying this paper. TC editor Dr. Guillaume  
481 Chambon provided additional comments and an important citation that helped reformulate the  
482 discussion.

483

484 **References**

- 485 Abele, G., Gow, A.: Compressibility Characteristics of Undisturbed Snow. Research Report 336,  
486 U.S. Army Cold Regions Research and Engineering Laboratory, Hanover, New  
487 Hampshire, 1975.
- 488 American Council of Snowmobile Associations: Economic Impact of the Snowmobiling  
489 Industry, URL: <<http://www.snowmobilers.org/>>, last accessed 4 April 2017, 2014.
- 490 Auerbach, N. A. and Halfpenny, J. C.: Snowpack and the subnivean environment for different  
491 aspects of an open meadow in Jackson Hole, Wyoming, USA, Arctic and Alpine  
492 Research, 23, 41-44, 1991.
- 493 Burakowski, E., and Magnusson, M.: Climate Impacts on the Winter Tourism Economy in the  
494 United States, Natural Resources Defense Council and Protect Our Winters, 33pp, 2012.
- 495 Colbeck, S.C.: An Overview of Seasonal Snow Metamorphism, Reviews of Geophysics and  
496 Space Physics, 20(1), 45-61, 1982.
- 497 Colbeck, S.C.: Theory of metamorphism of dry snow, Journal of Geophysical Research, 80(9),  
498 5475-5482, 1983.
- 499 Colbeck, S.C.: A review of the metamorphism and classification of seasonal snow cover crystals,  
500 Avalanche Formation, Movement and Effects, IAHS Pub. 162, 3-34, 1987.
- 501 Colorado Off-Highway Vehicle Coalition: Economic Contribution of Off-Highway Vehicle  
502 Recreation in Colorado, Report by Pinyon Environmental, Lakewood, CO USA, URL:  
503 <<http://www.cohvco.org/>>, last accessed 4 April 2017, 2016.
- 504 Cook, B. and Borrie, W.: Trends in Recreation Use and Management of Wilderness,  
505 International Journal of Wilderness, 1(2), 30-34, 1995.

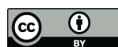

- 506 de Quervain, M.R.: On Metamorphism and Hardening of Snow under Constant Pressure and  
507 Temperature Gradient, IUGG General Assembly of Toronto, IASH Publication No. 46,  
508 pp 225-239, 1958.
- 509 Colorado Ski Country USA: Economic Study Reveals Ski Industry's \$4.8 Billion Annual Impact  
510 to Colorado, Summary of RRC Associates, Boulder, Colorado report on the Colorado ski  
511 industry, 9 December, 2015, Denver, CO, USA. URL:  
512 <[http://coloradoski.com/media\\_manager/mm\\_collections/view/183](http://coloradoski.com/media_manager/mm_collections/view/183)>, last accessed 4  
513 April 2017, 2015.
- 514 Dawson, J., and Scott, D.: Managing for climate change in the alpine ski sector, *Tourism  
515 Management*, 35, 244-254, 2013.
- 516 Diamond, M., and Lowry, W.P.: Correlation of density of new snow with 700 mb temperature,  
517 Snow, Ice and Permafrost Research Establishment Research Paper 1, US Army Corps of  
518 Engineers, 3 pp, 1953.
- 519 Fassnacht, S.R., and Soulis, E.D.: Implications during transitional periods of improvements of  
520 snow processes in the Land Surface Scheme – Hydrological Model WATCLASS,  
521 *Atmosphere-Ocean*, 40(4), 389-403, 2002.
- 522 Fahey, B., Wardle, K., and Weir, P.: Environmental effects associated with snow grooming and  
523 skiing at Treble Cone Ski Field. Part 2. Snow properties on groomed and non-groomed  
524 slopes, *Science for Conservation*, 120B, 49-62, 1999.
- 525 Fierz, C., Armstrong, R.L., Durand, Y., Etchevers, P., Greene, E., McClung, D.M., Nishimura,  
526 K., Satyawali, P.K. and Sokratov, S.A.: The International Classification for Seasonal  
527 Snow on the Ground, IHP-VII Technical Documents in Hydrology N°83, IACS  
528 Contribution N°1, UNESCO-IHP, Paris, 2009.
- 529 Gold, L.W.: Changes in a shallow snow cover subject to a temperate climate, *Journal of  
530 Glaciology*, 3, 218-222, 1958.
- 531 Giddings, J.C., and LaChapelle, E.: The Formation Rate of Depth Hoar, *Journal of Geophysical  
532 Research*, 67(6), 2377-2383, 1962.
- 533 Greene, E., Atkins, D., Birkeland, K., Elder, K., Landry, C., Lazar, B., McCammon, I., Moore,  
534 B., Sharaf, D., Strenenz, C., Tremper, B., and Williams, K.: Snow, Weather, and  
535 Avalanches: Observational Guidelines for Avalanche Programs in the United States,  
536 American Avalanche Association and USDA Forest Service National Avalanche Center,  
537 136 pp, 2009.
- 538 International Snowmobile Manufacturers Association: Snowmobiling Fact Book. ISMA, URL:  
539 <<http://www.snowmobile.org/>>, last accessed 4 April 2017, 2016.
- 540 Howard, R., and Stull, R.: Piste : A snow-physics model incorporating human factors for  
541 groomed ski slopes, *Journal of Hydrometeorology*, 15, 2429–2445, [doi :10.1175/JHM-  
542 D-14-0013.1], 2014.
- 543 Keddy, P., Spavold, A., and Keddy, C.: Snowmobile impact on old field and marsh vegetation in  
544 Nova Scotia, Canada : An experimental study, *Environmental Management* 3, 409–415,  
545 [doi: 10.1007/BF01866580], 1979.
- 546 Keller, T., Pielmeier, C., Rixen, C., Gadiant, F., Gustafsson, D., and Stähl, M.: Impact of  
547 artificial snow and ski-slope grooming on snowpack properties and soil thermal regime  
548 in sub-alpine ski area, *Annals of Glaciology*, 38, 314-318, 2004.
- 549 Lazar, B., and Williams, M.W.: Climate change in western ski areas: Potential changes in the  
550 timing of wet avalanches and snow quality for the Aspen ski area in the years 2030 and  
551 2100, *Cold Regions Science and Technology*, 51(2-3), 219-228, 2008.





- 552 Marke, T., Strasser, U., Hanzer, F., Stötter, J., Wilcke, R. A. I., and Gobiet, A.: Scenarios of  
553 future snow conditions in Styria (Austrian Alps), *Journal of Hydrometeorology*, 16, 261-  
554 277, doi:10.1175/JHM-D-14-0035.1, 2015.
- 555 Longley, R.W.: Snow depth and density at Resolute, Northwest Territories, *Journal of*  
556 *Glaciology*, 3, 733-738, 1960.
- 557 Mann, H.B., and Whitney, D.R.: On a Test of Whether one of Two Random Variables is  
558 Stochastically Larger than the Other, *Annals of Mathematical Statistics*, 18(1), 50–60,  
559 [doi:10.1214/aoms/11777304919], 1947.
- 560 McClung, D., and Schaerer, P.: *The Avalanche Handbook*, 3<sup>rd</sup> Edition, The Mountaineers Books,  
561 Seattle, Washington, 342 pp, 2006.
- 562 Moynier, J.: *Avalanche Aware: The Essential Guide to Avalanche Safety*, Morris Book  
563 Publishing, LLC, Guilford, Connecticut, 90 pp, 2006.
- 564 Nagler, A.M., C.T. Bastian, D.T. Taylor, and T.K. Foulke: 2011-2012 Wyoming Comprehensive  
565 Snowmobile Recreation Report, Report to the State of Wyoming, Department of State  
566 Parks and Cultural Resources, prepared by Department of Agricultural and Applied  
567 Economics, University of Wyoming, Laramie WY, 172pp, 2012. Pomeroy, J. W., and  
568 Brun, E.: Physical properties of snow, in Jones, H. G., Pomeroy, J. W., Walker, D. A.,  
569 and Hoham, R. W. (eds.), *Snow Ecology*. Cambridge: Cambridge University Press, 45-  
570 126, 2001.
- 571 Pruitt, W. O.: Why and how to study a snowcover, *Canadian Field-Naturalist*, 119(1), 118-128,  
572 2005.
- 573 Pytka, J.: Determination of snow stresses under vehicle loads, *Cold Regions Science and*  
574 *Technology*, 60, 137-145, [doi :10.1016/j.coldregions.2009.10.002], 2010.
- 575 Rixen, C., Stoeckli, V., Huovinen, C., and Huovinen, K.: The phenology of four subalpine herbs  
576 in relation to snow cover characteristics, *Soil-Vegetation-Atmosphere Transfer Schemes*  
577 *and Large-Scale Hydrological Models (Proceedings Sixth IAHS Scientific Assembly*  
578 *Symposium S5, Maastricht, July 2001)*, IAHS Pub., 270, 359-362, 2001.
- 579 Spandre, P., Morin S., Lafaysse M., Lejeune Y., François H., and Lejeune, Y.: Integration of  
580 snow management processes into a detailed snowpack model, *Cold Regions Science and*  
581 *Technology*, 125, 48-64, [doi:10.1016/j.coldregions.2016.01.002], 2016a.
- 582 Spandre, P., François, H., George-Marcelpoil, E., and Morin, S.: Panel based assessment of snow  
583 management operations in French ski resorts, *Journal of Outdoor Recreation and*  
584 *Tourism*, 16, 24-36, [doi: 10.1016/j.jort.2016.09.002], 2016b.
- 585 Shapiro, L. H., Johnson, J. B., Sturm, M., and Blaisdell, G. L.: *Snow Mechanics: Review of the*  
586 *State of Knowledge and Applications*, USA Cold Regions Research and Engineering  
587 Laboratory (CRREL), Research Report 97-3, 1997.
- 588 Shoop, S.A., Richmond, P.W., Lacombe, J.: Overview of cold regions mobility modeling at  
589 CRREL, *Journal of Terramechanics*, 43 (1), 1-26, 2006.
- 590 Sommerfeld, R. A., and LaChapelle, E.: The Classification of Snow Metamorphism, *Journal of*  
591 *Glaciology*, 9(55), 3-17, 1970.
- 592 Sturm, M., Taras, B., Liston, G. E., Derksen, C., Jonas, T., and Lea, J.: Estimating Snow Water  
593 Equivalent Using Snow Depth Data and Climate Classes, *Journal of Hydrometeorology*,  
594 11, 1380-1394, 2010.
- 595 Tercek, M., and Rodman, A.: Forecasts of 21st Century Snowpack and Implications for  
596 Snowmobile and Snowcoach Use in Yellowstone National Park, *PLoS ONE*, 11(7),  
597 e0159218, [doi:10.1371/journal.pone.0159218], 2016.



- 598 Thumlert, S., Exner, T., Jamieson, B., and Bellaire, S.: Measurements of localized dynamic  
599 loading in a mountain snow cover, *Cold Regions Science and Technology*, 85, 94-101,  
600 [doi :10.1016/j.coldregions.2012.08.005], 2013.
- 601 US Forest Service: National Visitor Use Monitoring Results, USDA Forest Service National  
602 Summary Report Data collected FY 2008 through FY 2012, US Department of  
603 Agriculture, URL: <<http://www.fs.fed.us/recreation/programs/nvum/>>, last accessed 4  
604 April 2017, 2013a.
- 605 US Forest Service: Modifications Made to Medicine Bow National Forest Winter Travel Special  
606 Order - Release date Nov. 15, 2013, Medicine Bow National Forest, URL:  
607 <<https://www.fs.usda.gov/detail/mbr/news-events/?cid=STELPRDB5440798>>, last  
608 accessed 7 April 2017, 2013b.
- 609 US Forest Service: National Visitor Use Monitoring Results, USDA Forest Service National  
610 Summary Report Data collected FY 2005 through FY 2009, US Department of  
611 Agriculture, URL: <<http://www.fs.fed.us/recreation/programs/nvum/>>, last accessed 4  
612 April 2017, 2010.
- 613 Wahl, K. L.: Evaluation of trends in runoff in the western United States: Managing water  
614 resources during global change, *Proceedings of the Annual Conference and Symposium*,  
615 Reno, NV, American Water Resources Association, 701-710, 1992.
- 616 Wilcoxon, F.: Individual comparisons by ranking methods, *Biometrics Bulletin*, 1(6), 80-83,  
617 [doi:10.2307/3001968], 1945.
- 618 Winter Wildlands Alliance: Winter Recreation on Western National Forest Lands: A  
619 Comprehensive Analysis of Motorized and Non-Motorized Opportunity and Access,  
620 Winter Wildlands Alliance, Boise, Idaho, 44 pp, 2006.  
621



622 **Table 1.** Statistical difference (p-values) between no snowmobile use (control) and varying snow  
 623 compaction treatments on snowpack properties at the study plots located at Rabbit Ears Pass  
 624 (REP) and Fraser Experimental Forest (FEF), Colorado during the 2009-2010 winter season for  
 625 a) density, b) temperature, c) hardness, and e) ram resistance. Statistically significant differences  
 626 at the  $p < 0.05$  confident level are highlighted in grey, and highly significant ( $p < 0.01$ ) difference  
 627 are denoted with an asterisk.  
 628

| a) Density |                                  |        | control | Shallow initiation depth (30 cm) |        |        |
|------------|----------------------------------|--------|---------|----------------------------------|--------|--------|
|            |                                  |        |         | Low                              | Medium | High   |
| REP        | Shallow initiation depth (30 cm) | Low    | <0.01*  |                                  |        | <0.01* |
|            |                                  | High   | <0.01*  | <0.01*                           |        |        |
|            | Deep initiation depth (120 cm)   | Low    | 0.44    | <0.01*                           |        | <0.01* |
|            |                                  | High   | 0.24    | <0.01*                           |        | <0.01* |
| FEF        | Shallow initiation depth (30 cm) | Low    | <0.01*  |                                  | 0.29   | 0.30   |
|            |                                  | Medium | <0.01*  | 0.29                             |        | 0.98   |
|            |                                  | High   | <0.01*  | 0.30                             | 0.98   |        |

  

| b) Temperature |                                  |        | No use | Shallow initiation depth (30 cm) |        |      |
|----------------|----------------------------------|--------|--------|----------------------------------|--------|------|
|                |                                  |        |        | Low                              | Medium | High |
| REP            | Shallow initiation depth (30 cm) | Low    | 0.22   |                                  |        | 0.11 |
|                |                                  | High   | 0.70   | 0.11                             |        |      |
|                | Deep initiation depth (120 cm)   | Low    | 0.77   | 0.34                             |        | 0.50 |
|                |                                  | High   | 1.00   | 0.22                             |        | 0.70 |
| FEF            | Shallow initiation depth (30 cm) | Low    | 0.12   |                                  | 0.89   | 0.10 |
|                |                                  | Medium | 0.14   | 0.89                             |        | 0.13 |
|                |                                  | High   | 0.64   | 0.10                             | 0.13   |      |

  

| c) Hardness |                                  |        | No use | Shallow initiation depth (30 cm) |        |        |
|-------------|----------------------------------|--------|--------|----------------------------------|--------|--------|
|             |                                  |        |        | Low                              | Medium | High   |
| REP         | Shallow initiation depth (30 cm) | Low    | <0.01* |                                  |        | 0.16   |
|             |                                  | High   | <0.01* | 0.16                             |        |        |
|             | Deep initiation depth (120 cm)   | Low    | 0.42   | <0.01*                           |        | <0.01* |
|             |                                  | High   | 0.06   | 0.02                             |        | <0.01* |
| FEF         | Shallow initiation depth (30 cm) | Low    | <0.01* |                                  | 0.36   | 0.01   |
|             |                                  | Medium | <0.01* | 0.36                             |        | 0.08   |
|             |                                  | High   | <0.01* | 0.01                             | 0.08   |        |

  

| d) Ram resistance |                                  |        | No use | Shallow initiation depth (30 cm) |        |        |
|-------------------|----------------------------------|--------|--------|----------------------------------|--------|--------|
|                   |                                  |        |        | Low                              | Medium | High   |
| REP               | Shallow initiation depth (30 cm) | Low    | <0.01* |                                  |        | 0.08   |
|                   |                                  | High   | <0.01* | 0.08                             |        |        |
|                   | Deep initiation depth (120 cm)   | Low    | 0.32   | <0.01*                           |        | <0.01* |
|                   |                                  | High   | 0.07   | 0.01                             |        | <0.01* |
| FEF               | Shallow initiation depth (30 cm) | Low    | <0.01* |                                  | 0.33   | <0.01* |
|                   |                                  | Medium | <0.01* | 0.33                             |        | <0.01* |
|                   |                                  | High   | <0.01* | <0.01*                           | <0.01* |        |

634  
 635



636 **Table 2.** Depth hoar grain size at the snow compaction study plots located at Rabbit Ears Pass  
 637 (REP) and Fraser Experimental Forest (FEF), Colorado during the 2009-2010 winter season.  
 638

|     |                                  | date       | Basal layer grain size [mm] |     |        |      |
|-----|----------------------------------|------------|-----------------------------|-----|--------|------|
|     |                                  |            | control                     | Low | Medium | High |
| REP | Shallow initiation depth (30 cm) | 12/12/2009 | 3.0                         | 1.0 |        | <0.5 |
|     |                                  | 01/09/2010 | 2.0                         | 3.0 |        | 1.0  |
|     |                                  | 02/06/2010 | 3.0                         | 1.5 |        | 1.0  |
|     |                                  | 03/13/2010 | 3.0                         | 3.0 |        | 1.0  |
|     |                                  | 04/17/2010 | 1.5                         | 1.5 |        | 1.0  |
|     | Deep initiation depth (120 cm)   | 12/12/2009 | 3.0                         | 3.0 |        | 3.0  |
|     |                                  | 01/09/2010 | 2.0                         | 3.0 |        | 1.5  |
|     |                                  | 02/06/2010 | 3.0                         | 3.5 |        | 3.0  |
|     |                                  | 03/13/2010 | 3.0                         | 3.0 |        | 3.5  |
|     |                                  | 04/17/2010 | 1.5                         | 1.5 |        | 1.5  |
| FEF | Shallow initiation depth (30 cm) | 12/27/2009 | 4.0                         | 3.0 | 1.0    | 1.0  |
|     |                                  | 01/22/2010 | 3.0                         | 1.0 | 2.0    | 1.5  |
|     |                                  | 02/12/2010 | 4.5                         | 2.0 | 2.0    | 1.5  |
|     |                                  | 03/26/2010 | 9.0                         | 1.0 | 2.5    | 1.5  |
|     |                                  | 04/26/2010 | 5.0                         | 1.5 | 3.0    | 3.0  |

639  
 640  
 641



## List of Figures

1. The snow compaction study plots are located near Rabbit Ears Pass in Routt National Forest and Fraser Experimental Forest in the Arapaho-Roosevelt National Forest, Colorado.
2. Snow water equivalent for the 2010 water year (WY2010) measured at a) the Columbine SNOTEL site near Rabbit Ears Pass, Colorado and b) the Berthoud Summit SNOTEL near Fraser Experimental Forest. Data was obtained online from the Natural Resource Conservation Service (NRCS) National Water and Climate Center (<http://www.wcc.nrcs.usda.gov/>).
3. Density profiles for five dates (i to v) measured at the REP snow compaction study plot for no (control), low, and high use treatments beginning on a) 30 cm and b) 120 cm of snow, and c) the FEF snow compaction study plot for no (control), low, medium, and high use treatments beginning on 30 cm of snow. Note that free floating measurements represent overlapping density measurements.
4. Temperature profiles measured at a) the REP snow compaction study plot on February 06, 2010 for no, low, and high use treatments beginning on 30 cm and 120 cm of snow and b) the FEF snow compaction study plot on March 26, 2010 for no, low, medium, and high use treatments beginning on 30 cm of snow.
5. Hardness profiles for five dates (i to v) measured at the REP snow compaction study plot for no, low, and high use treatments beginning on a) 30 cm and b) 120 cm of snow, and c) the FEF snow compaction study plot for no, low, medium, and high use treatments beginning on 30 cm of snow.
6. Ram resistance profiles for five dates (i to v) measured at a) the REP snow compaction study plot for no, low, and high use treatments beginning on 30 cm and 120 cm of snow and b) the FEF snow compaction study plot for no, low, medium, and high use treatments beginning on 30 cm of snow. Note that free floating measurements represent overlapping density measurements.
7. Snowpit data for Walton Creek (no snowmobile use), Dumont Lakes (moderate snowmobile use) and Muddy Creek (high snowmobile use) in the Rabbit Ears Pass recreational use areas illustrating a) density, b) hardness, c) ram resistance, and d) SWE.

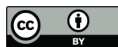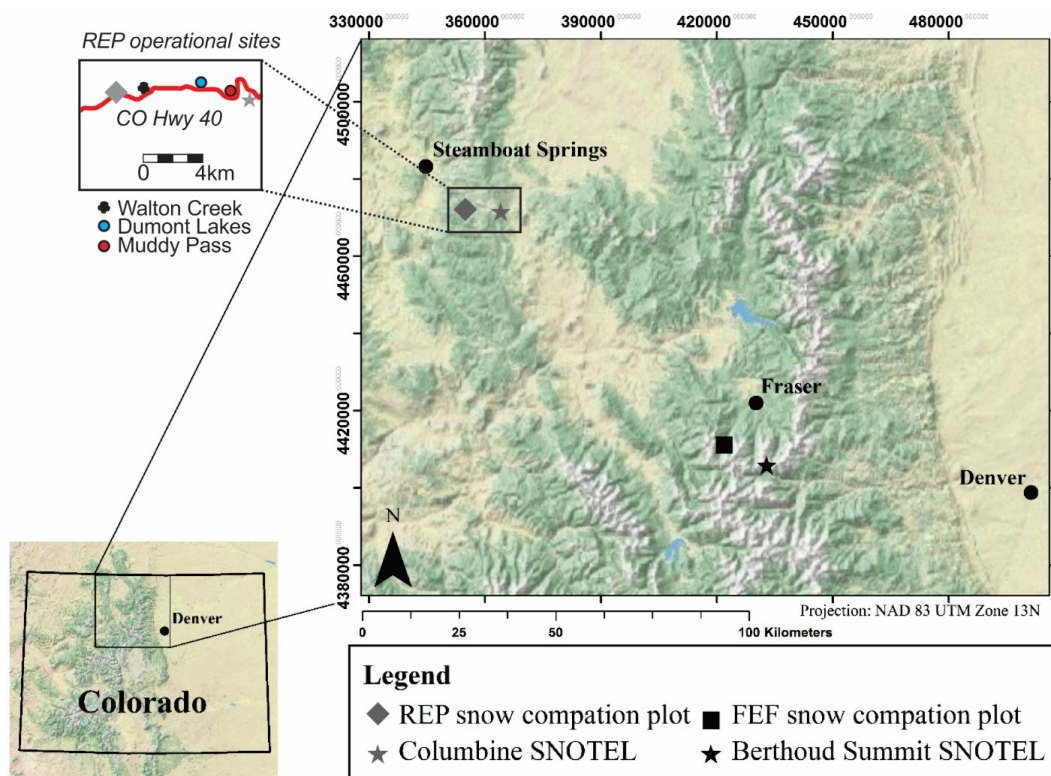

**Figure 1.** The snow compaction study plots are located near Rabbit Ears Pass in Routt National Forest and Fraser Experimental Forest in the Arapaho-Roosevelt National Forest, Colorado.

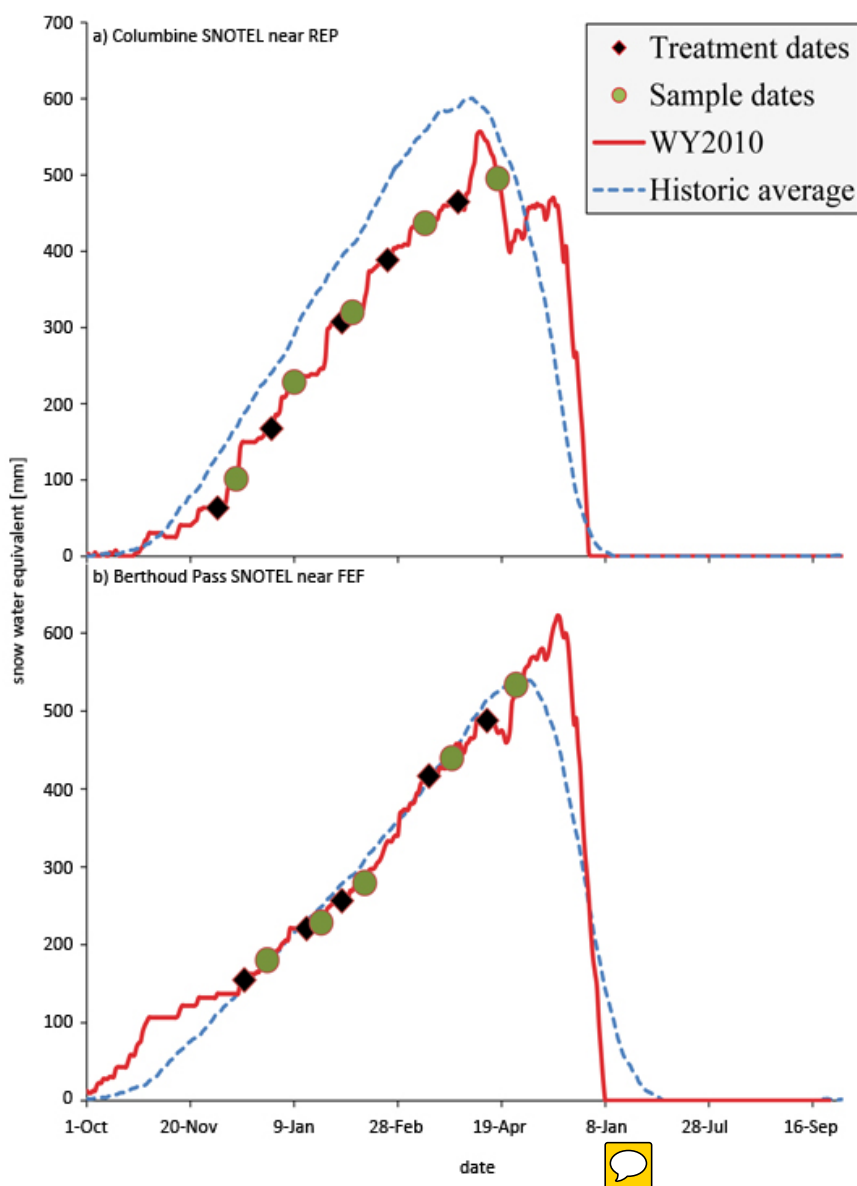

**Figure 2.** Snow water equivalent for the 2010 water year (WY2010) measured at a) the Columbine SNOTEL site near Rabbit Ears Pass, Colorado and b) the Berthoud Summit SNOTEL near Fraser Experimental Forest. Data was obtained online from the Natural Resource Conservation Service (NRCS) National Water and Climate Center (<http://www.wcc.nrcs.usda.gov/>).



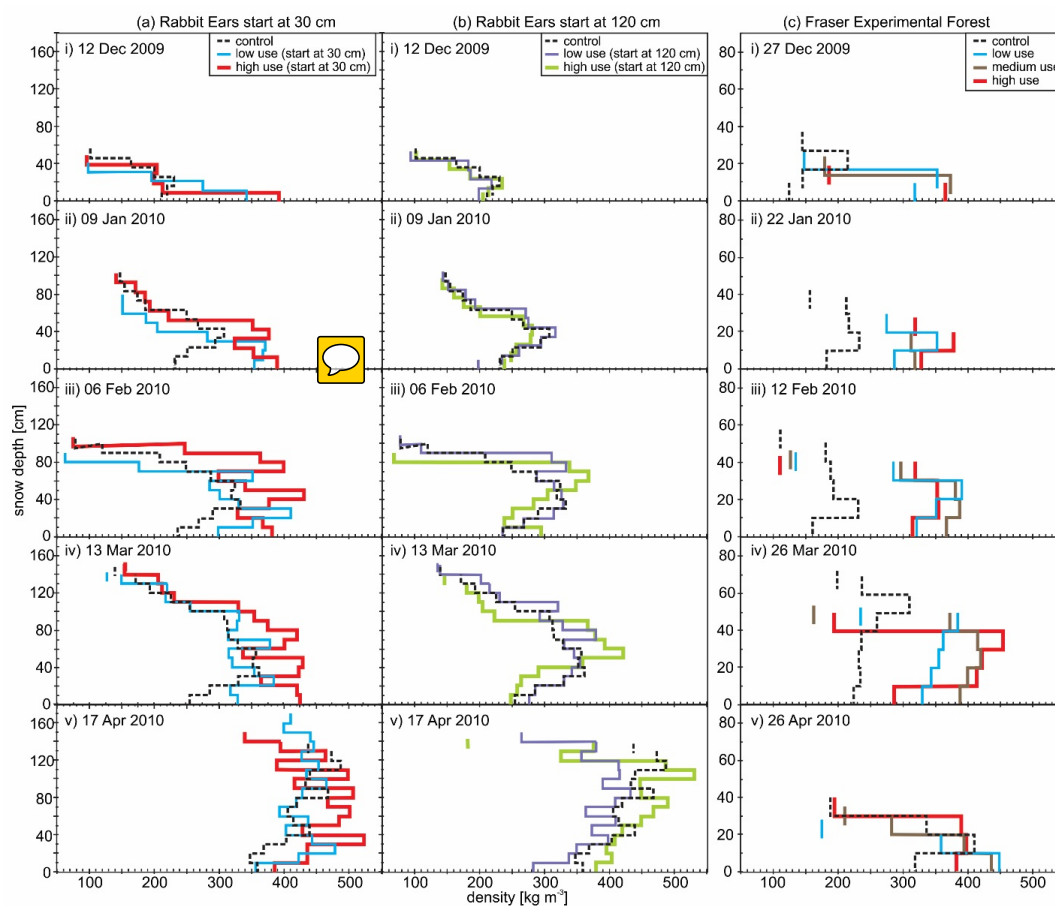

**Figure 3.** Density profiles for five dates (i to v) measured at the REP snow compaction study plot for no (control), low, and high use treatments beginning on a) 30 cm and b) 120 cm of snow, and c) the FEF snow compaction study plot for no (control), low, medium, and high use treatments beginning on 30 cm of snow. Note that free floating measurements represent overlapping density measurements.



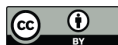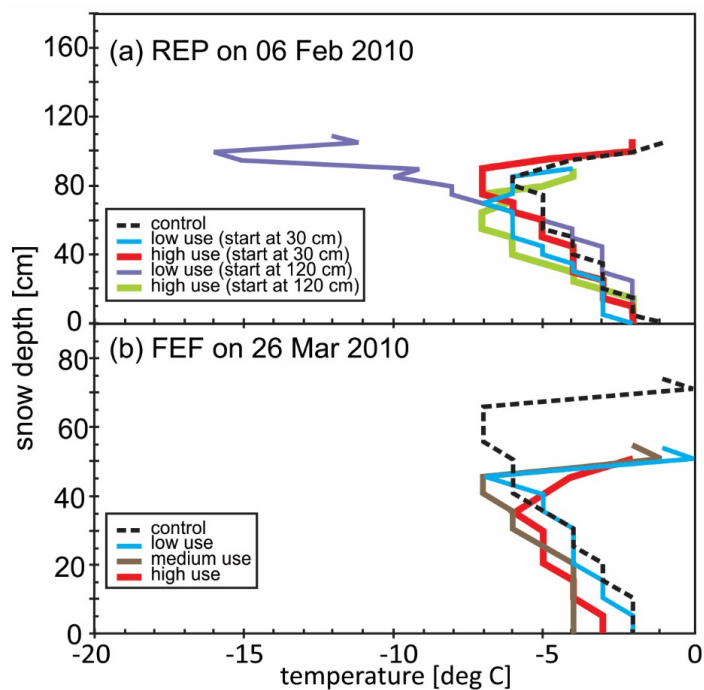

**Figure 4.** Temperature profiles measured at a) the REP snow compaction study plot on February 06, 2010 for no, low, and high use treatments beginning on 30 cm and 120 cm of snow and b) the FEF snow compaction study plot on March 26, 2010 for no, low, medium, and high use treatments beginning on 30 cm of snow.

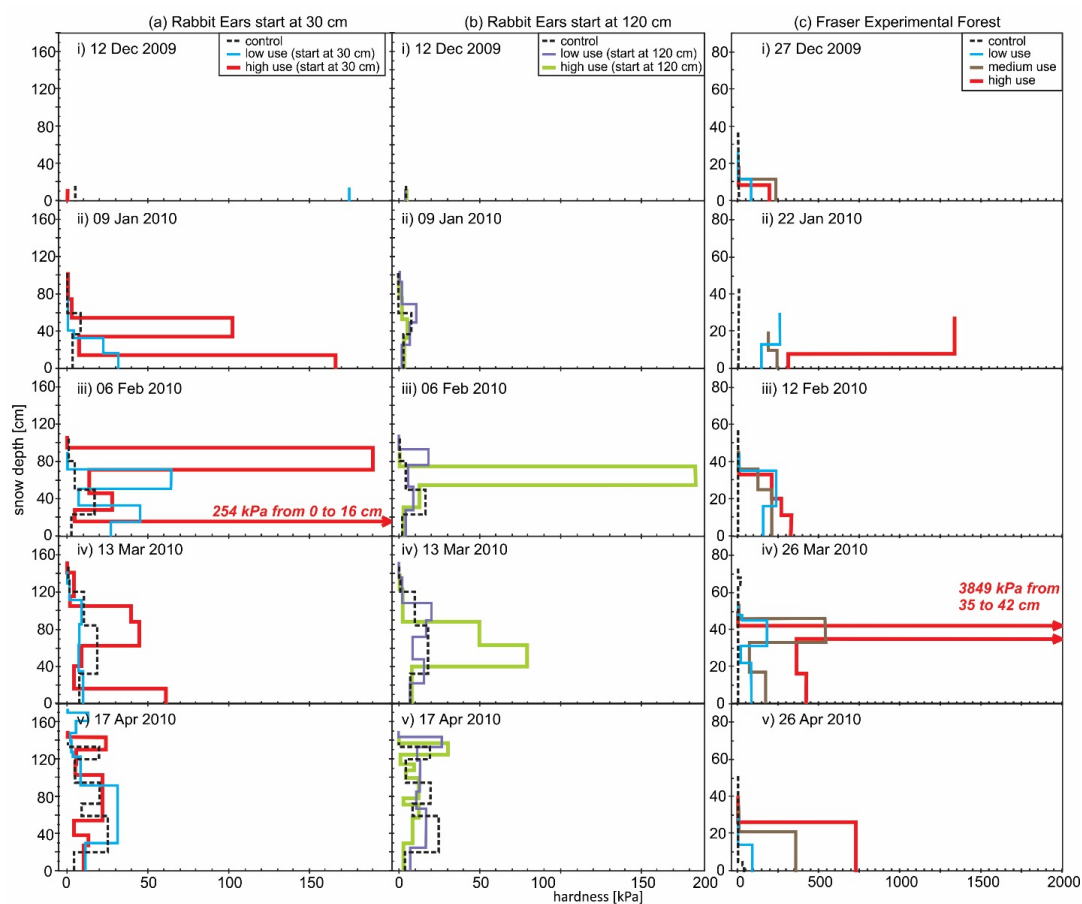

**Figure 5.** Hardness profiles for five dates (i to v) measured at the REP snow compaction study plot for no, low, and high use treatments beginning on a) 30 cm and b) 120 cm of snow, and c) the FEF snow compaction study plot for no, low, medium, and high use treatments beginning on 30 cm of snow.

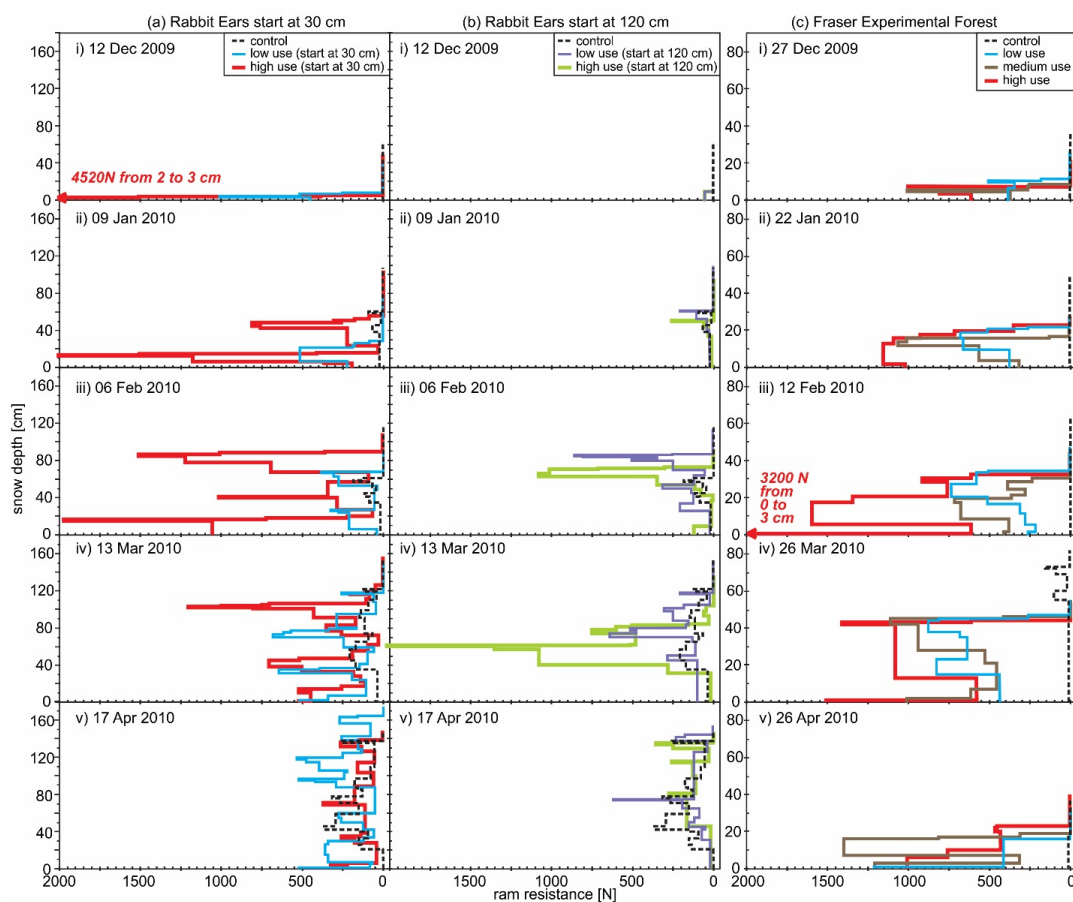

**Figure 6.** Ram resistance for five dates (i to v) profiles measured at the REP snow compaction study plot for no, low, and high use treatments beginning on a) 30 cm and b) 120 cm of snow, and c) the FEF snow compaction study plot for no, low, medium, and high use treatments beginning on 30 cm of snow.

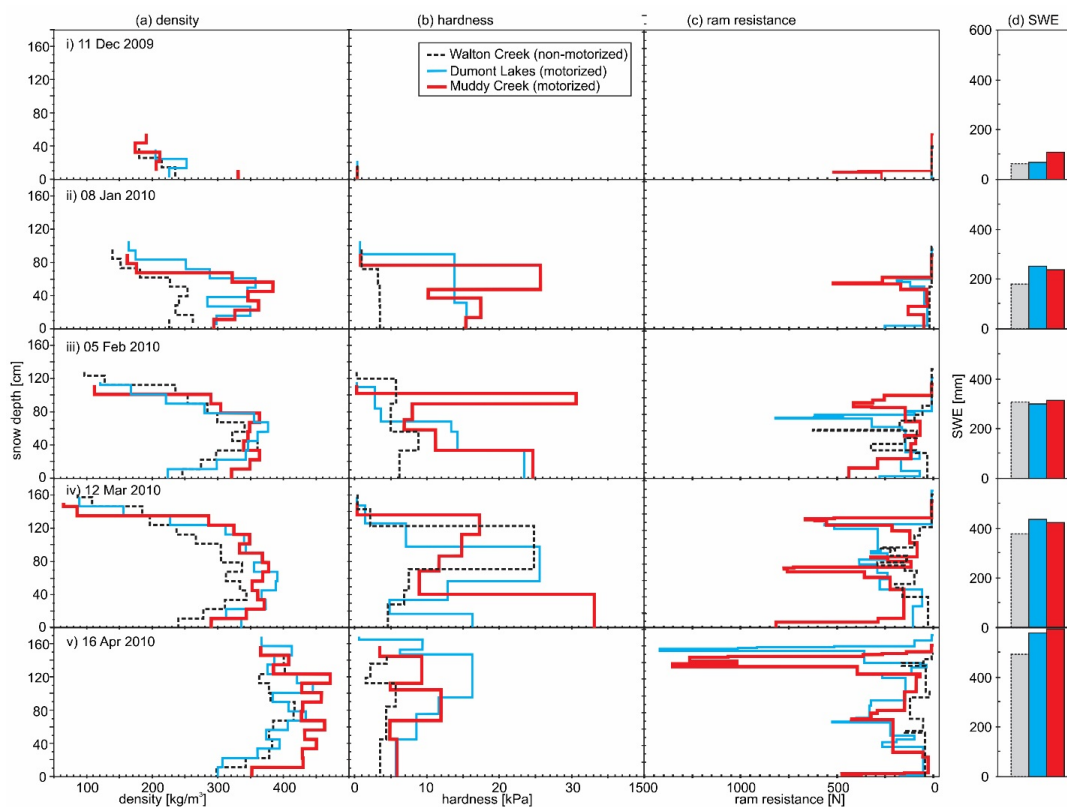

**Figure 7.** Snowpit data for Walton Creek (no snowmobile use), Dumont Lakes (moderate snowmobile use) and Muddy Creek (high snowmobile use) in the Rabbit Ears Pass recreational use areas illustrating a) density, b) hardness, c) ram resistance, and d) SWE.
